# Supplementary material for: Silica precipitation with synthetic silaffin peptides
Source: Royal Society of Chemistry journal article supplement (doi:10.1039/c1ob05406f), 2011-01-01
Supplement: c1ob05406f.pdf [file c1ob05406f.pdf]

## Supplementary information

### Silica Precipitation with Synthetic Silaffin Peptides

Ralph Wieneke<sup>1</sup>, Anja Bernecker<sup>2</sup>, Radostan Riedel<sup>1</sup>, Manfred Sumper<sup>3</sup>,  
Claudia Steinem<sup>2\*</sup>, and Armin Geyer<sup>1\*</sup>

<sup>1</sup>*Faculty of Chemistry, Philipps-Universität Marburg, 35032 Marburg, Germany*

<sup>2</sup>*Institute of Organic and Biomolecular Chemistry, University of Göttingen, Tammannstr. 2,  
37077 Göttingen, Germany*

<sup>3</sup>*Biochemistry, University of Regensburg, 93040 Regensburg, Germany*

Emails: [csteine@gwdg.de](mailto:csteine@gwdg.de), [geyer@staff.uni-marburg.de](mailto:geyer@staff.uni-marburg.de)

### Supporting information content

|                                             |     |
|---------------------------------------------|-----|
| Silica precipitation assays                 | S11 |
| NMR data ( <sup>1</sup> H, <sup>13</sup> C) | S12 |
| MALDI-TOF spectra of hexapeptides           | S22 |

### General information

**Characterization:** NMR spectra were recorded on a Bruker Avance 300, Bruker DRX 400, Bruker DRX 500 or Bruker Avance 600 spectrometers. For <sup>1</sup>H NMR (300, 400, 500 or 600 MHz) spectra, δ values were referenced to CDCl<sub>3</sub> (7.26 ppm) or DMSO-d<sub>6</sub> (2.49 ppm), and for <sup>13</sup>C (75, 100, 125 or 150 MHz) spectra, δ values were referenced to CDCl<sub>3</sub> (77.1 ppm) or DMSO-d<sub>6</sub> (39.5 ppm) as the solvents. Mass spectra (MS) were recorded on Finnigan MAT 95, Finnigan TSQ 7000 or Finnigan LTQ-FT (ES) instruments or on a Bruker Biflex III MALDI-TOF using either hydroxy-α-cyanocinnamic acid (HCCA) or 2,5-dihydroxybenzoic acid (DHB) as matrices. Optical rotations were measured on a Perkin-Elmer 241 polarimeter with a microcell (10 cm, 1 mL) at ambient temperatures.

**Reagents and solvents:** All commercially available reagents and protected amino acids were purchased and used without further purification. All the solvents used for reactions were distilled over appropriate drying reagents prior to use. Commercially available ACS grade solvents were used for column chromatography and HPLC grade solvents for peptide synthesis without any further purification.

**Reactions and purifications:** All reactions were monitored by thin layer chromatography (TLC) using aluminium plates with a UV fluorescent indicator (normal SiO<sub>2</sub>, Merck 60 F254). The following methods were used for visualization: UV absorption by fluorescence quenching; Ninhydrin spray (1.0 g in 100 mL EtOH). Flash chromatography was performed using Merck type 60, 0.040-0.063 mm mesh silica gel.

High performance liquid chromatography (HPLC) was performed on a Dionex chromatograph equipped with a UVD 340 variable wavelength UV detector and a ASI 100 injector. The column used was steel walled Dionex Acclaim 120 C18, 5 μm, 4.6 x 150 mm.

RW E 460  
MRP DMSO /opt/topspin prk 23

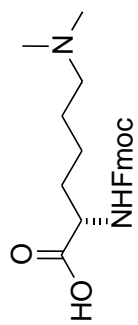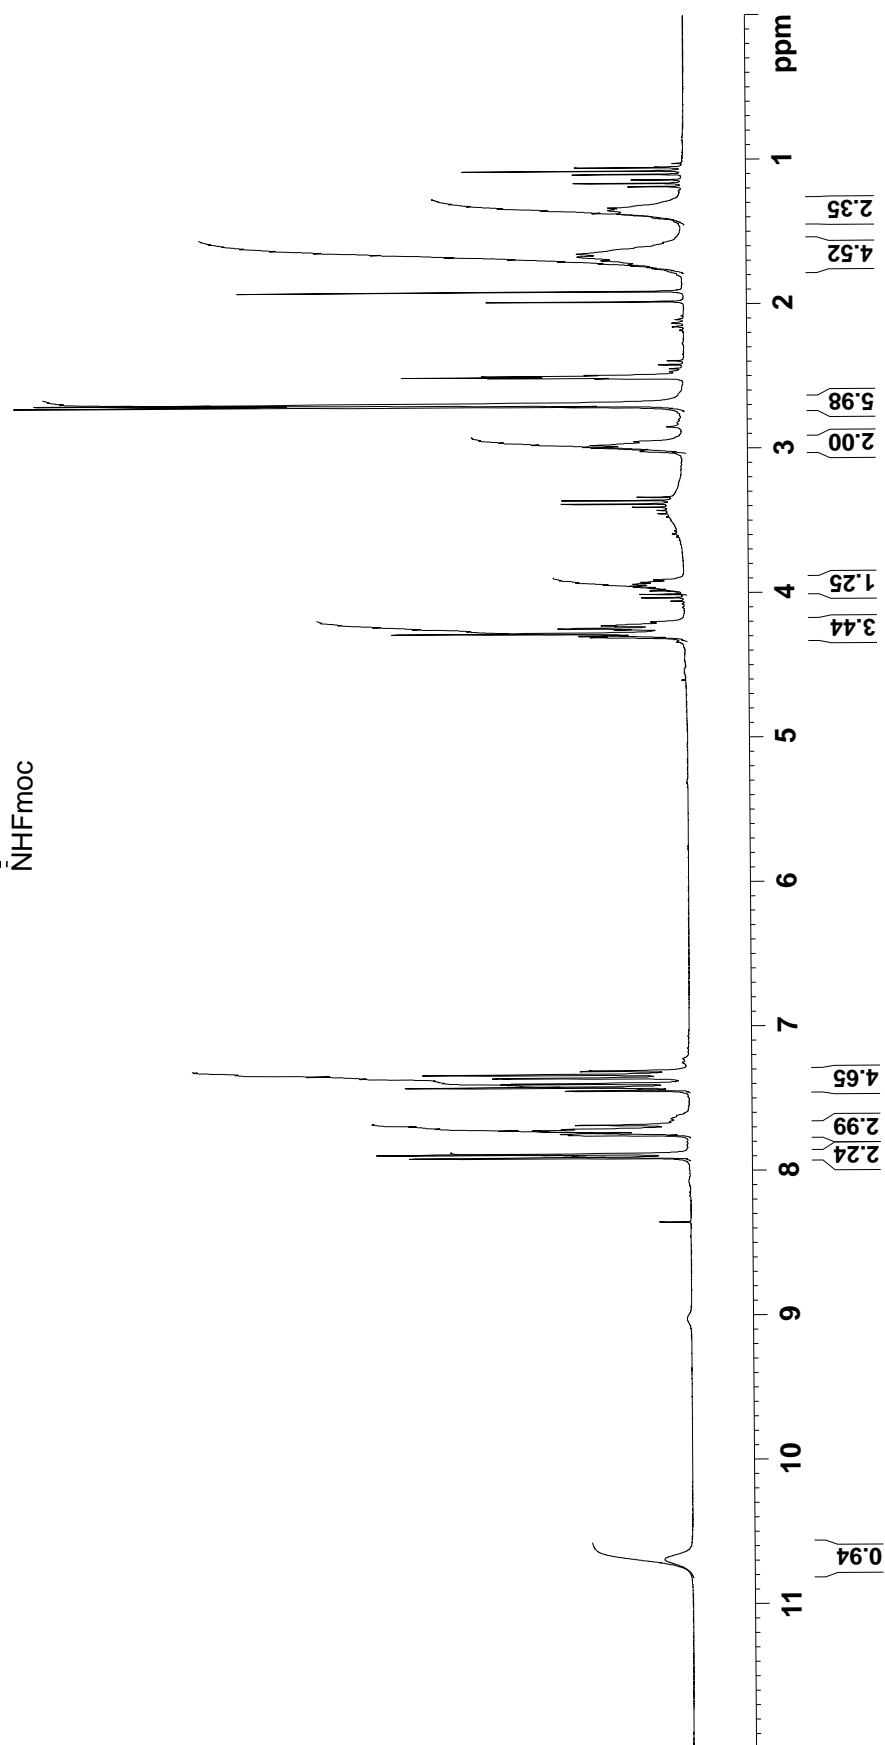

RW E 460  
MRC DMSO /opt/topspin prk 23

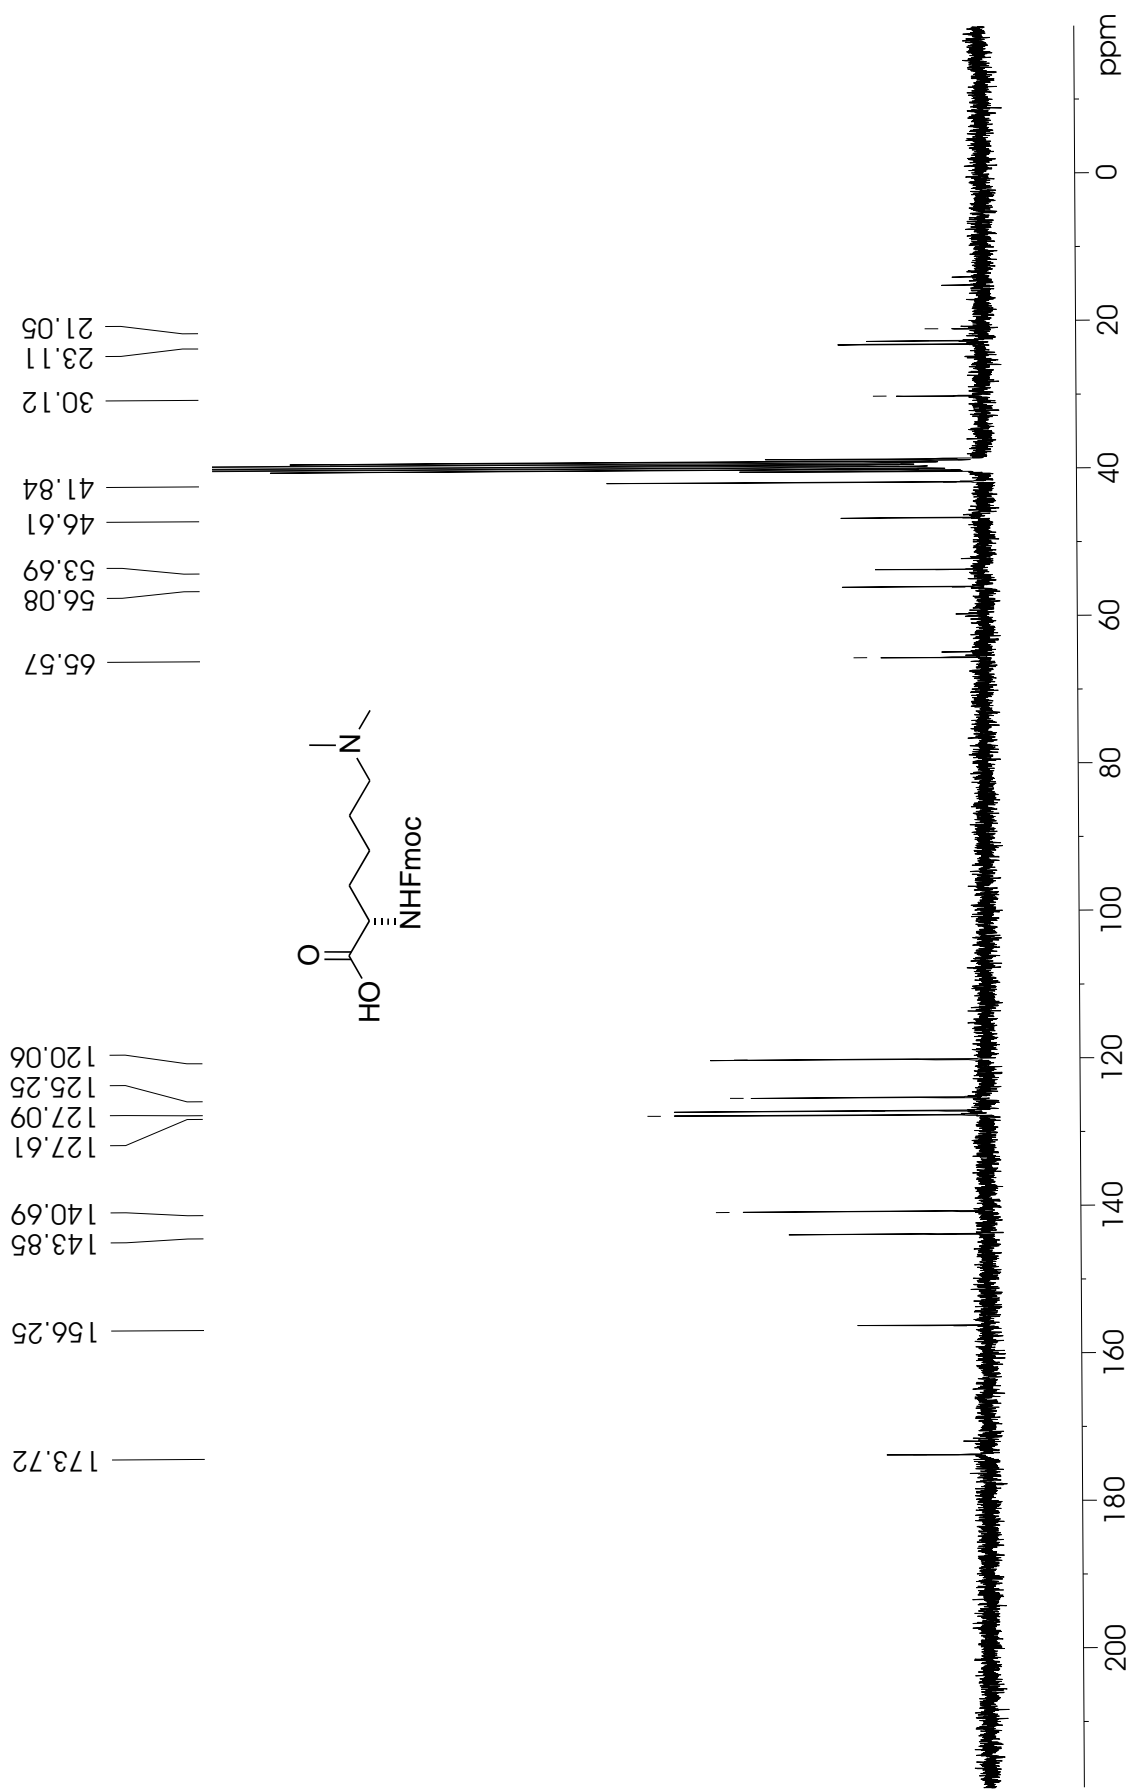

RW E 424  
MRP CDCI3 /opt/topspin prk 34

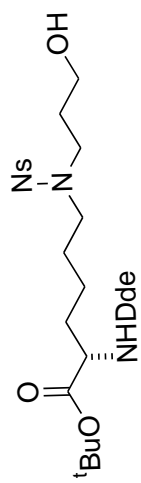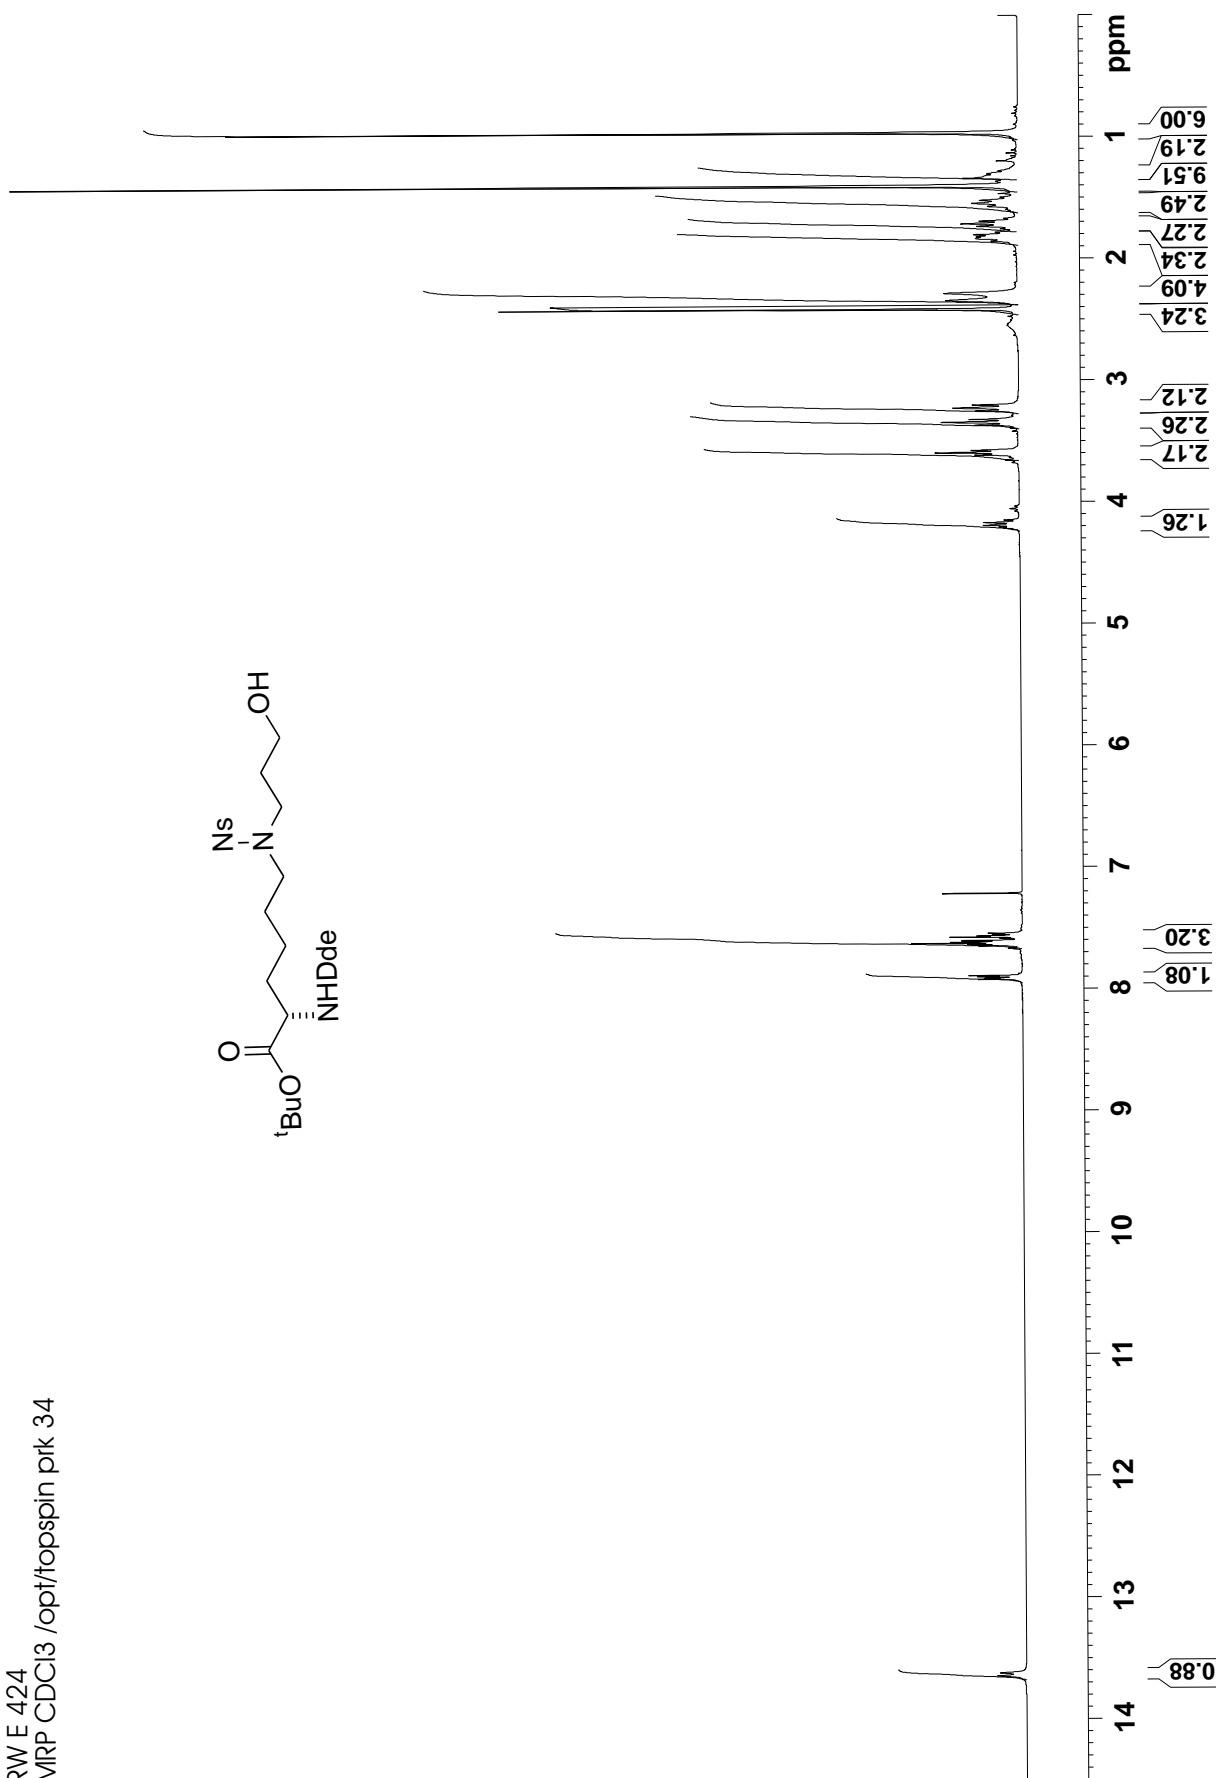

RW E 424  
MRC CDCI3 /opt/topspin prk 34

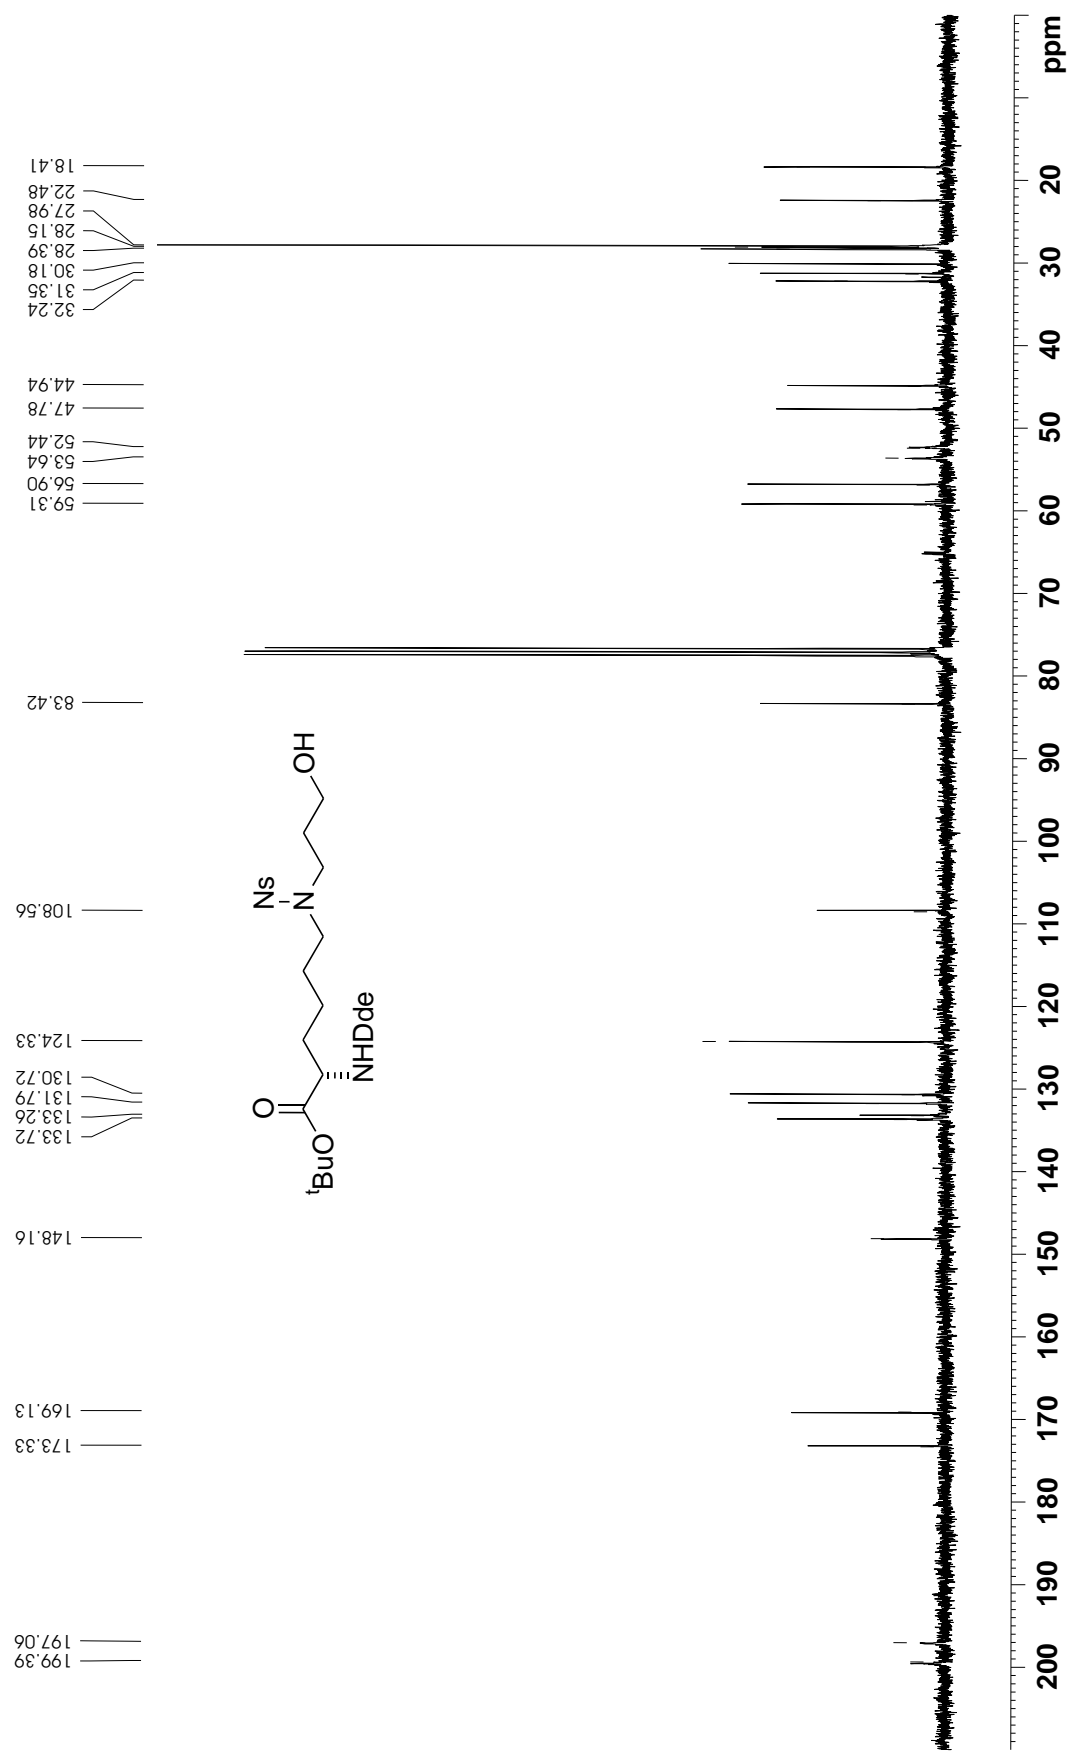

RW E 427  
MRP CDCI3 /opt/topspin prk 22

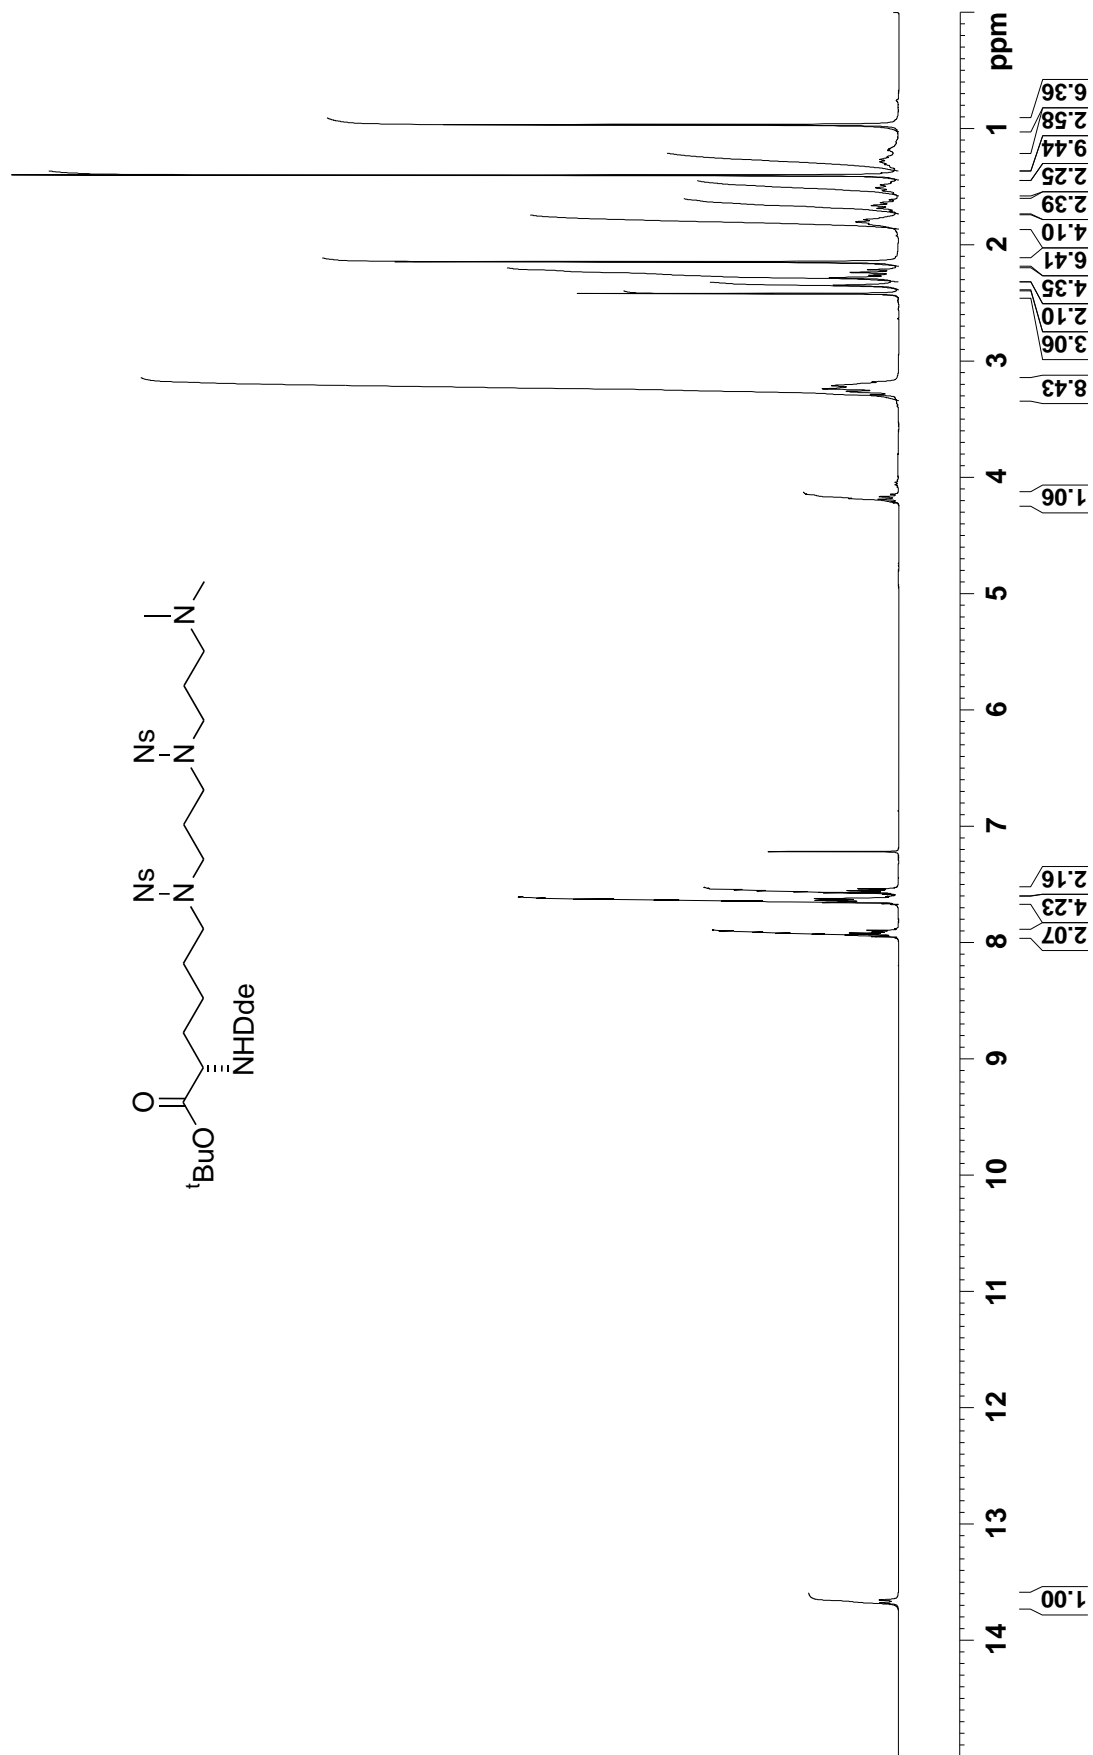

RW E 427  
MRC CDCI3 /opt/topspin prk 22

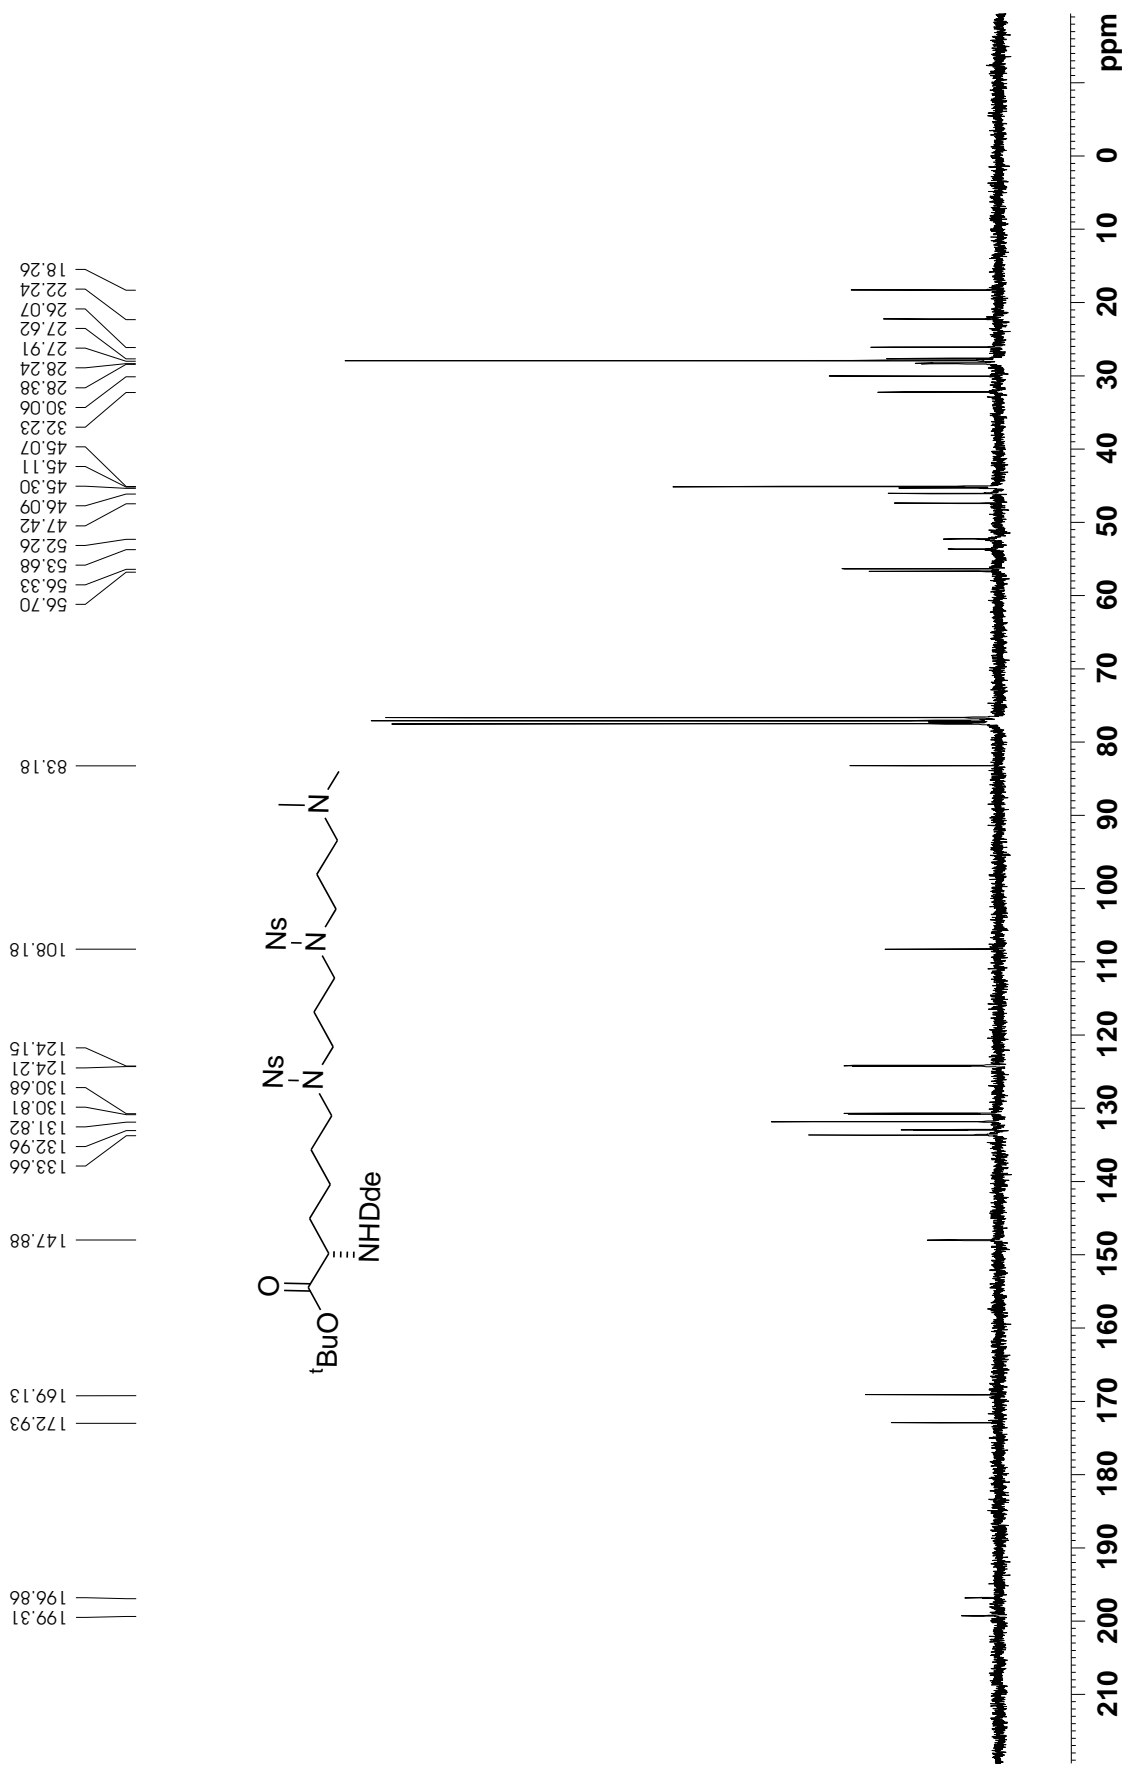



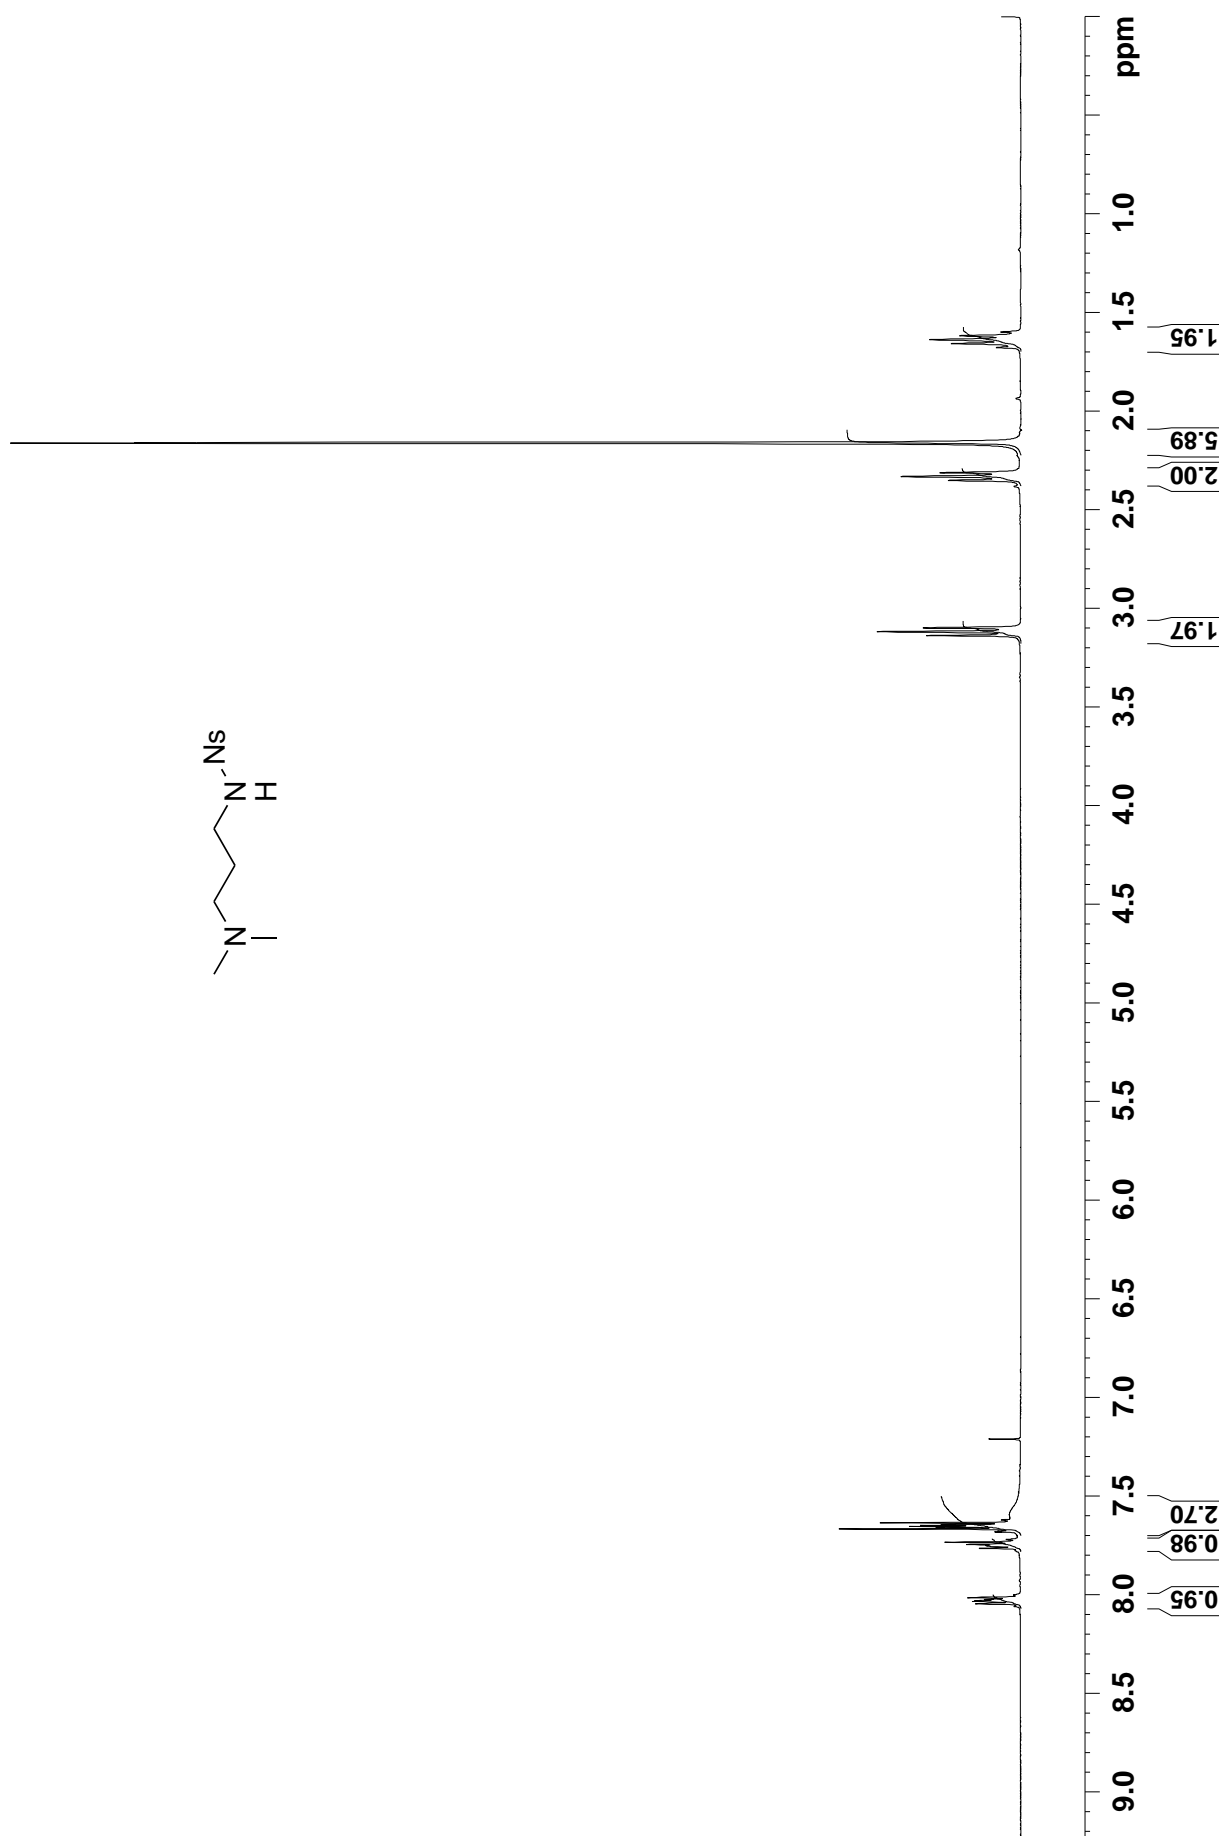

RW D 381  
MRC CDCI3 /opt/topspin prk 59

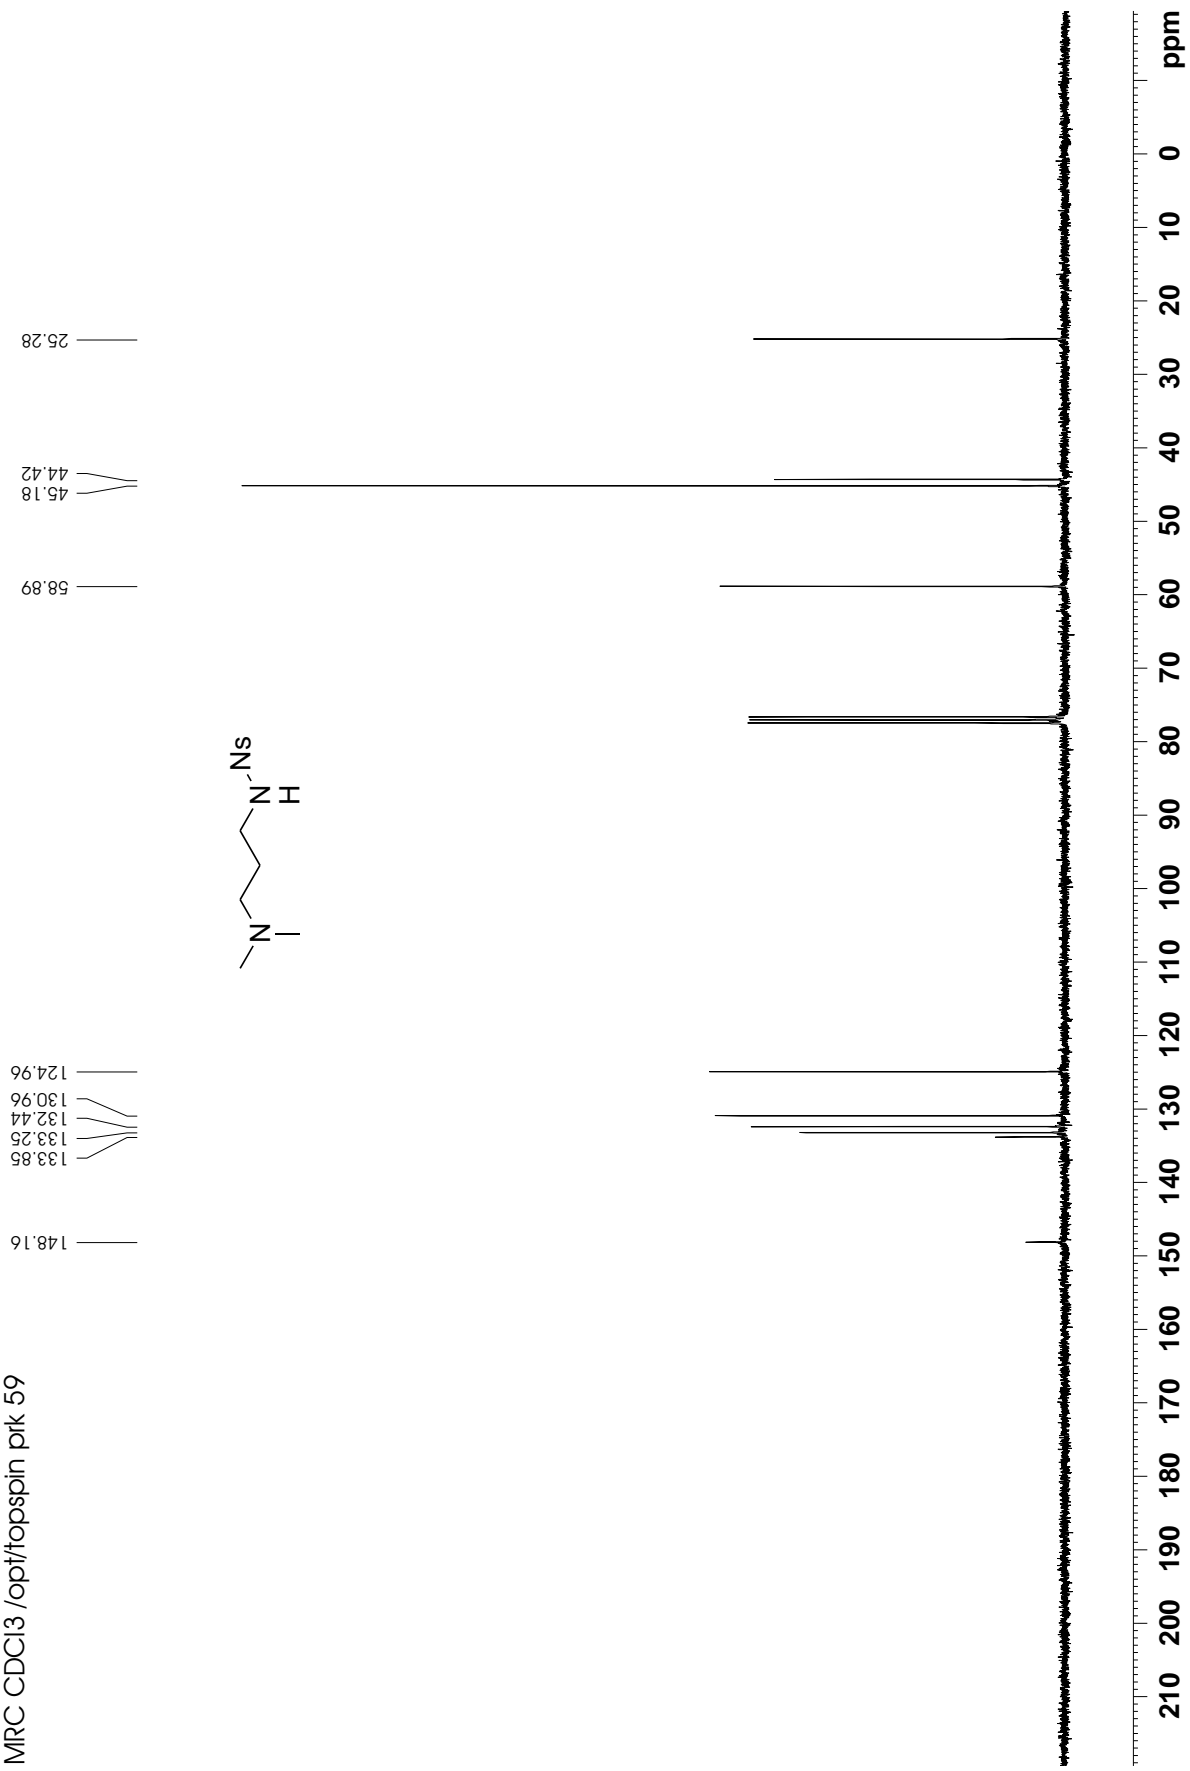

RR 349

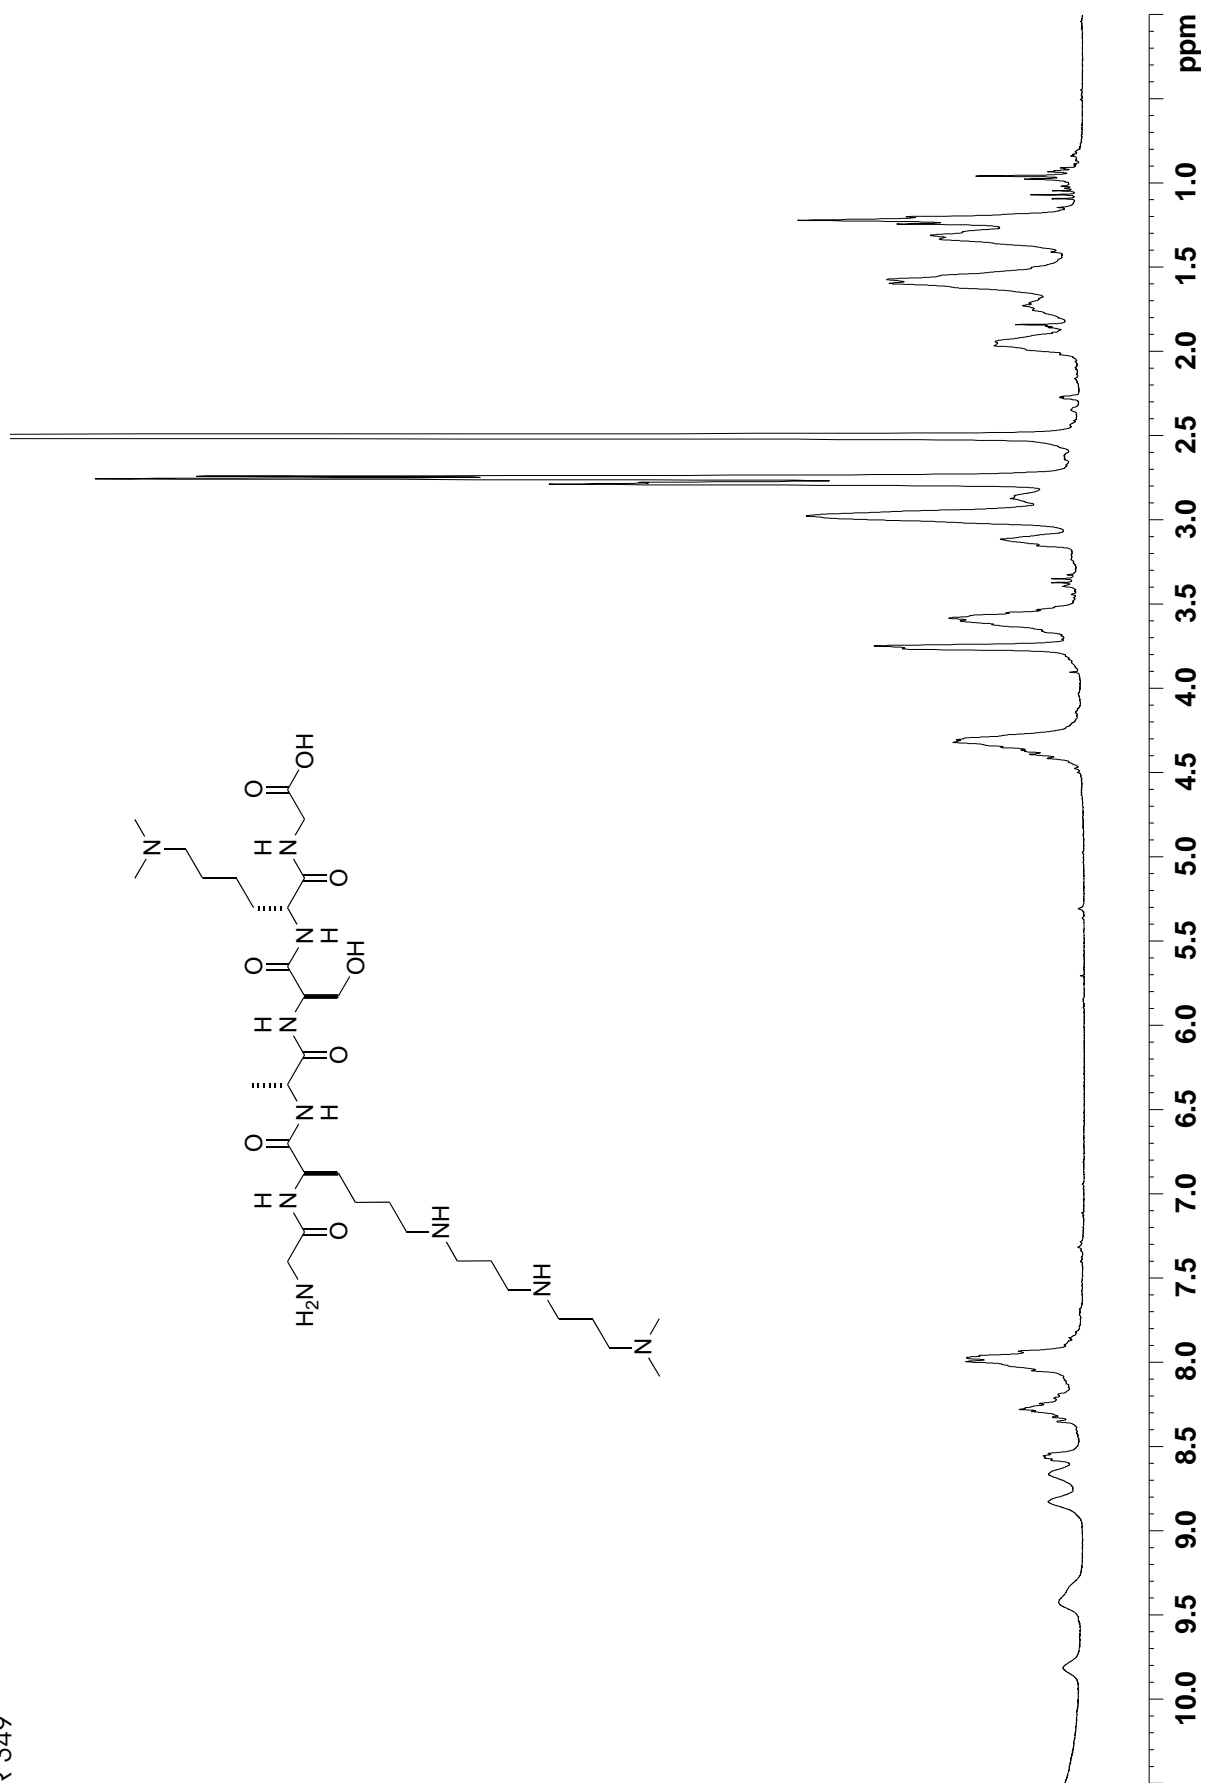

RR 350

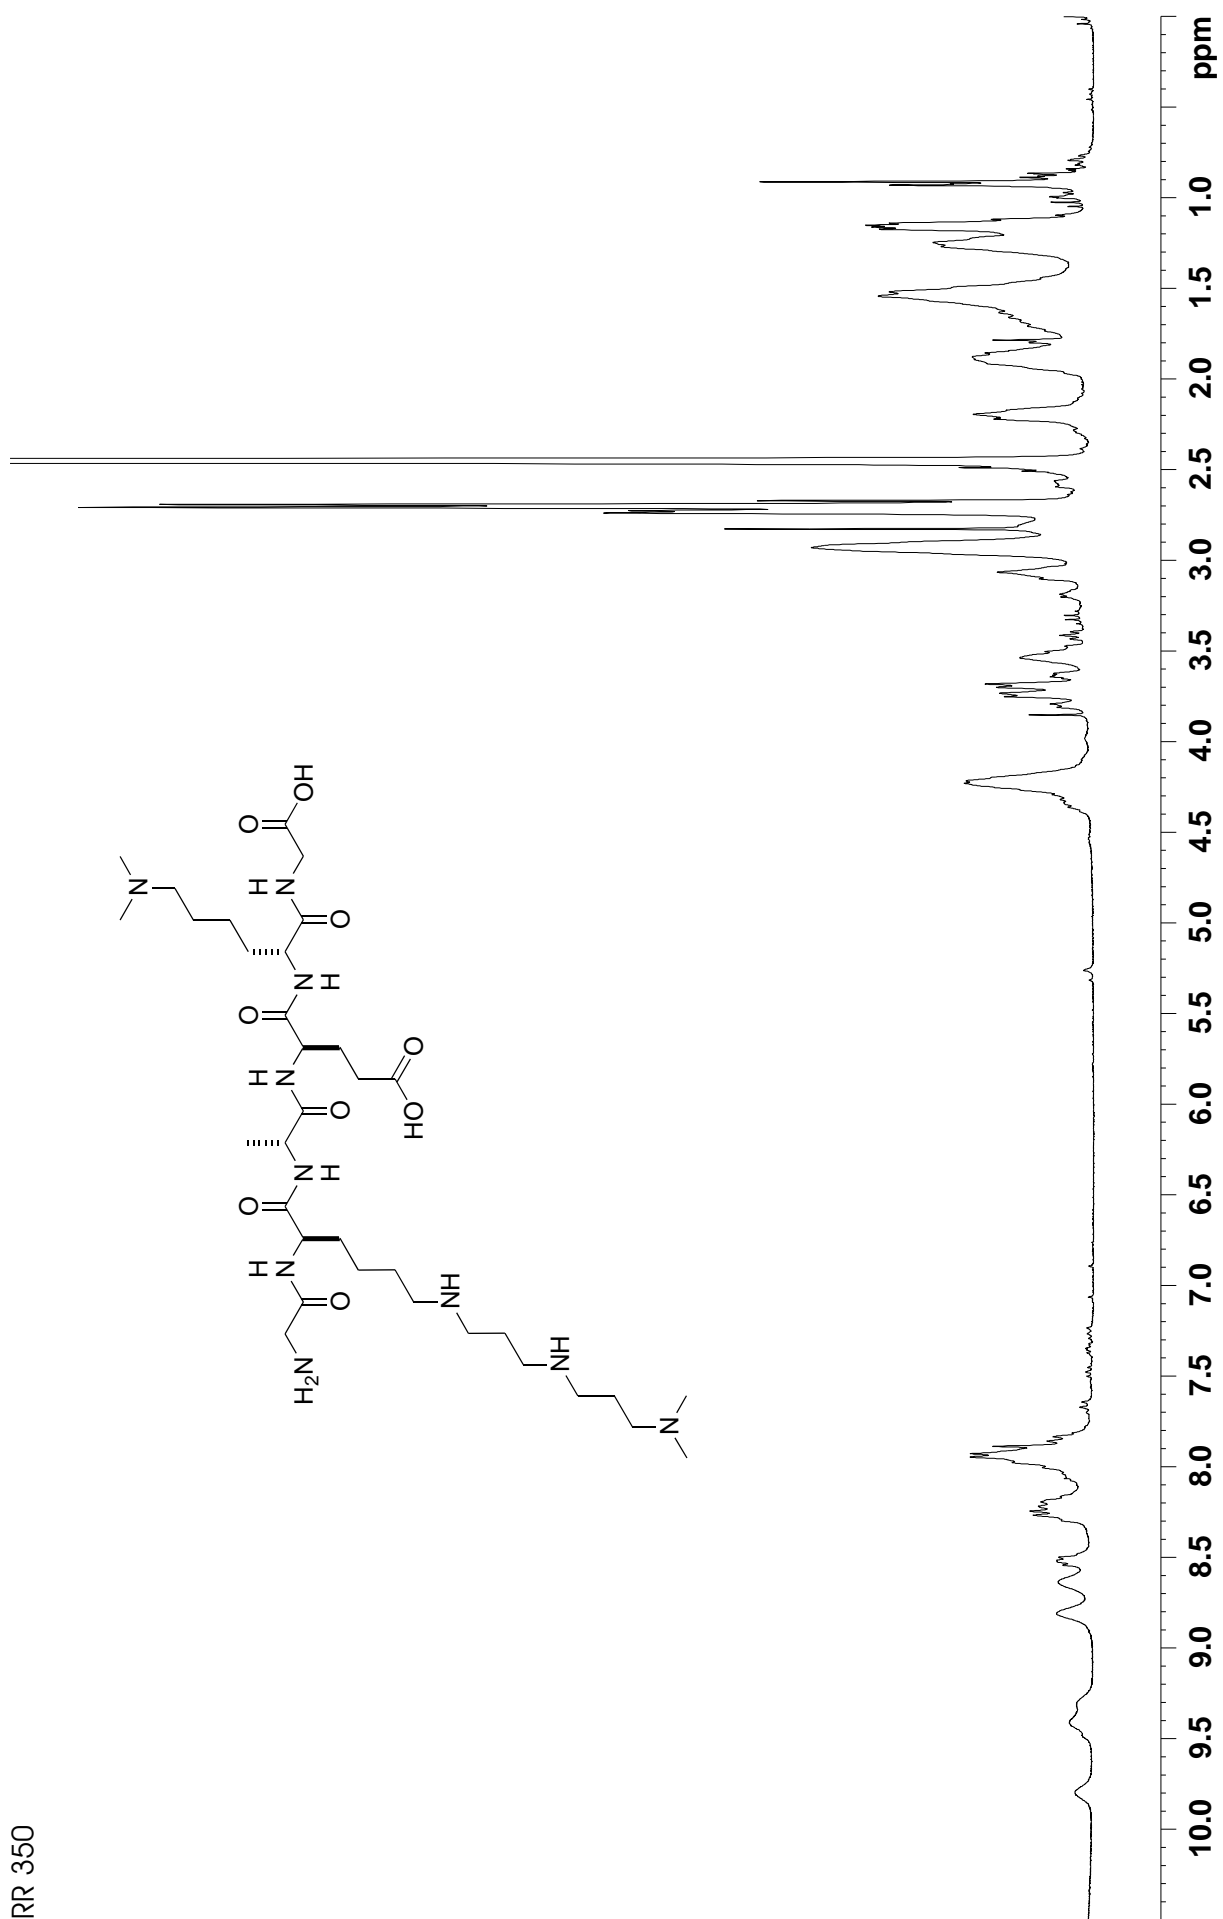

```

INSTRUM TOF
OpId tof
SMPNAM RR350b
AQ_DATE Tue Jan 6 09:48:52 2009
PATH /data/akgeyer
POLARI POS
AQOP_m Reflector
TD 100000
NoSHOTS 140
SMONUM 0
SMOPTS1 0
SMOPTS2 0
SMOPTS3 0
Dw 0.50 [ns]
DELAY 20000 [ns]
Uis1 19.50 [KV]
Uis2 16.90 [KV]
Urefl 20.00 [KV]
Ulens 10.00 [KV]
Ulimass 10.00 [KV]
RefFull 20.00 [KV]
UdetL 1.45 [KV]
UdetR 1.50 [KV]
REPHZ 2.00 [KV]
ATTEN 5.00 [Hz]
MT1 66.0
MT2 732786.161
MT3 350.687
-0.060
HITURBO no
CDEON yes
CDELY medium
DEFLOX no
FLNSRD no
LNSRND no
UTS2BND no
DFCAL1 710.24
DFPASS 300.00 [Da]
RENDVAL 0.33
LENDVAL 0.28
TS2BNDV 0.91
CMT1
CMT2
MOTPOS (0.0,0.0)
    
```

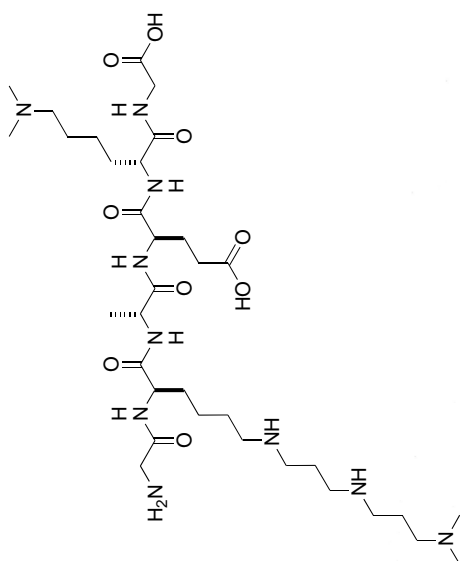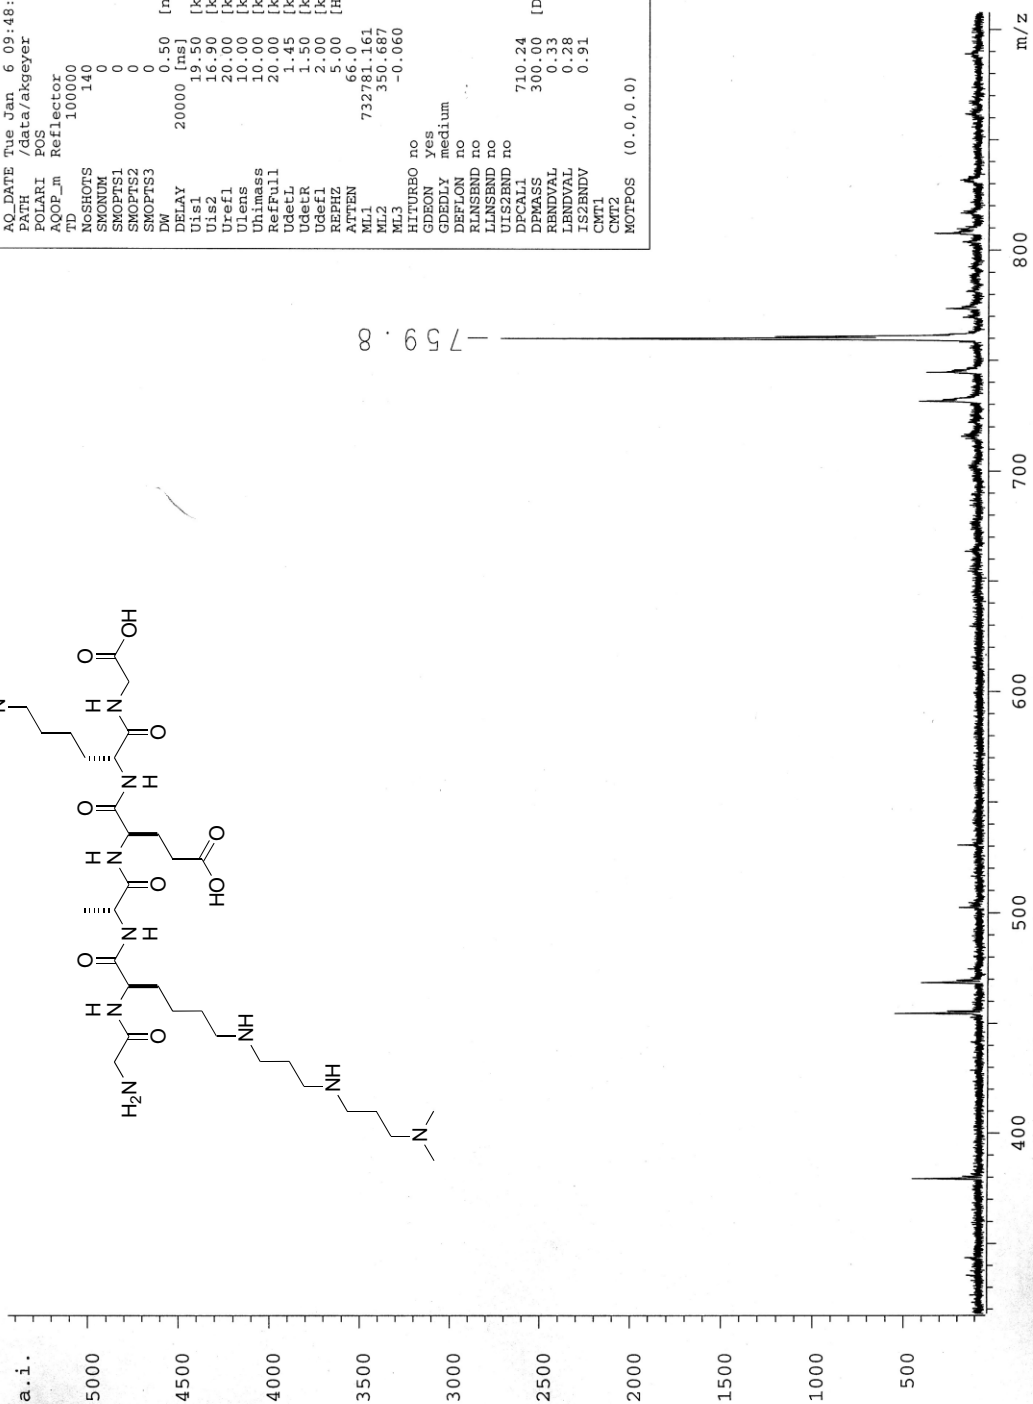

/data/akgeyer/RR350b/0\_G5\_1Sref/pdata/1 tof Tue Jan 6 09:49:32 2009
